# Supplementary material for: Doping and pretreatment optimized the adsorption of *OCHO on bismuth for the electrocatalytic reduction of CO2to formate
Source: Royal Society of Chemistry journal article supplement (doi:10.1039/d2nr06638f), 2023-01-01
Supplement: d2nr06638f1.pdf [file d2nr06638f1.pdf]

## Supporting Information

# Doping and Pretreatment Optimized the Adsorption of \*OCHO on Bismuth for Electrocatalytic Reduction CO<sub>2</sub> to Formate

Meng Tian,<sup>a</sup> Shanshan Wu,<sup>a</sup> Yang Hu,<sup>a</sup> Zhaori Mu,<sup>a</sup> Zhi Li,<sup>a</sup> Yichao Hou,<sup>a</sup> Pinxian Xi\*<sup>a</sup> and  
Chun-Hua Yan<sup>a,b</sup>

<sup>a</sup> State Key Laboratory of Applied Organic Chemistry, Frontiers Science Center for Rare Isotopes, College of Chemistry and Chemical Engineering, Lanzhou University, Lanzhou 730000, China, E-mail: xipx@lzu.edu.cn

<sup>b</sup> Beijing National Laboratory for Molecular Sciences, State Key Laboratory of Rare Earth Materials Chemistry and Applications, PKU-HKU Joint Laboratory in Rare Earth Materials and Bioinorganic Chemistry, College of Chemistry and Molecular Engineering Peking University, Beijing 100871, China

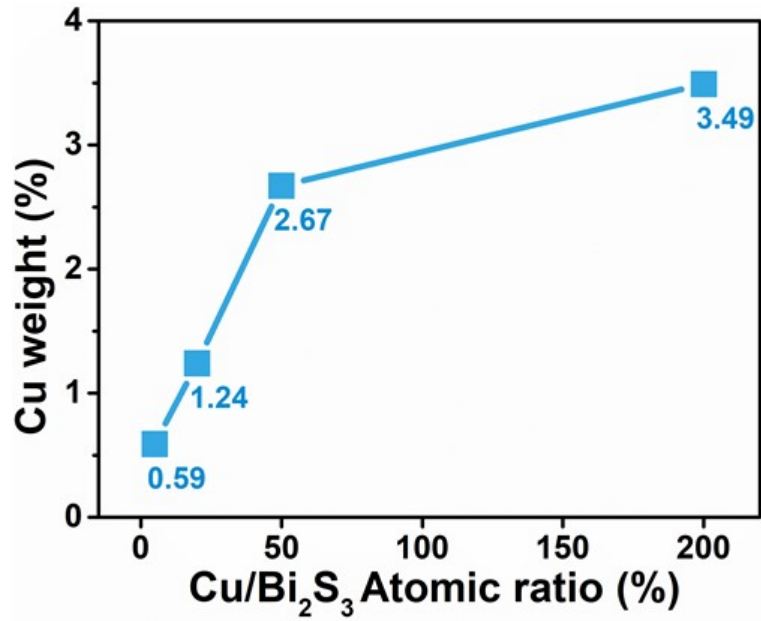

**Fig. S1** ICP images of Cu-doped Bi<sub>2</sub>S<sub>3</sub> samples.

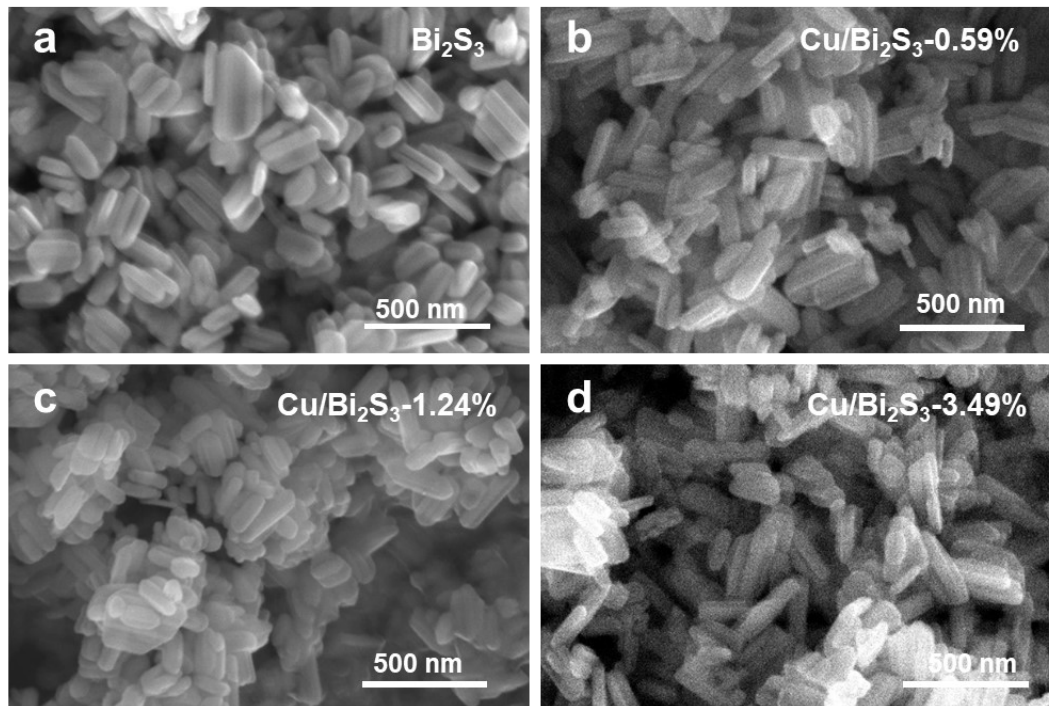

**Fig. S2** SEM images of Bi<sub>2</sub>S<sub>3</sub> (a), Cu/Bi<sub>2</sub>S<sub>3</sub>-0.59% (b), Cu/Bi<sub>2</sub>S<sub>3</sub>-1.24% (c) and Cu/Bi<sub>2</sub>S<sub>3</sub>-3.49% (d).

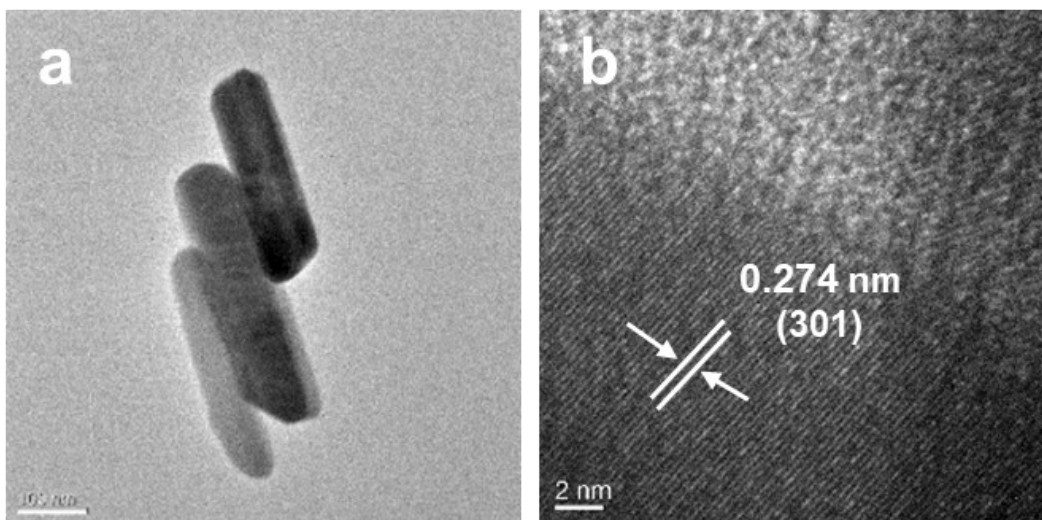

**Fig. S3** TEM (a) and HRTEM (b) images of  $\text{Bi}_2\text{S}_3$ .

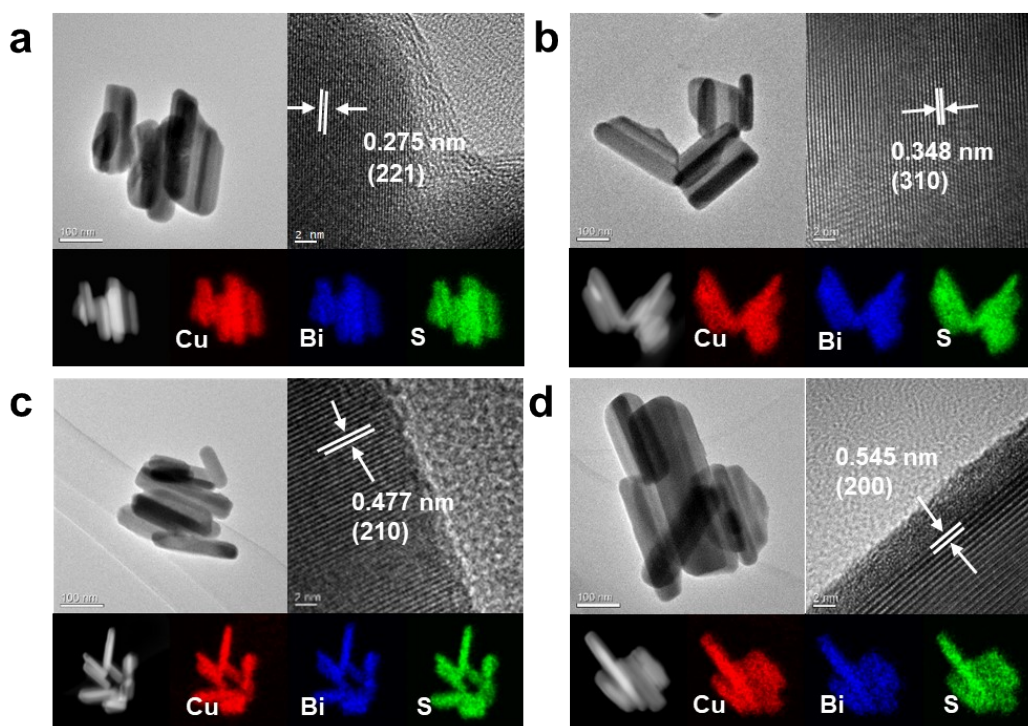

**Fig. S4** TEM, HRTEM and corresponding elemental mapping images of  $\text{Cu}/\text{Bi}_2\text{S}_3$ -0.59% (a),  $\text{Cu}/\text{Bi}_2\text{S}_3$ -1.24% (b),  $\text{Cu}/\text{Bi}_2\text{S}_3$ -2.67% (c) and  $\text{Cu}/\text{Bi}_2\text{S}_3$ -3.49% (d).

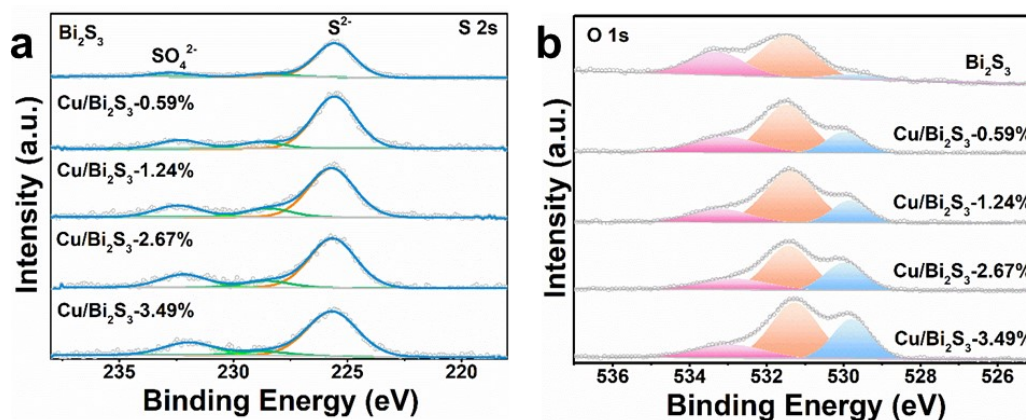

**Fig. S5** (a) S 2s XPS spectra and (b) O 1s XPS spectra of  $\text{Bi}_2\text{S}_3$ ,  $\text{Cu}/\text{Bi}_2\text{S}_3$ -0.59%,  $\text{Cu}/\text{Bi}_2\text{S}_3$ -1.24%,  $\text{Cu}/\text{Bi}_2\text{S}_3$ -2.67% and  $\text{Cu}/\text{Bi}_2\text{S}_3$ -3.49%.

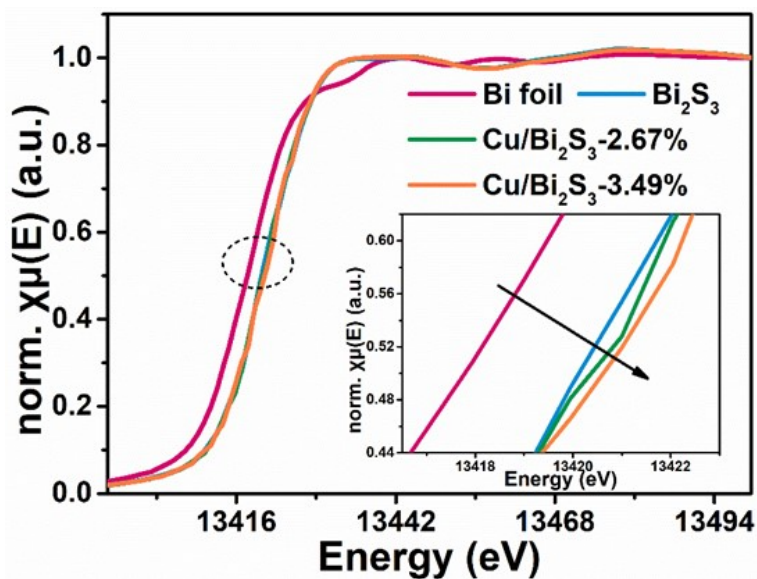

**Fig. S6** Bi L<sub>3</sub>-edge XANES spectra (the inset is a partial enlargement).

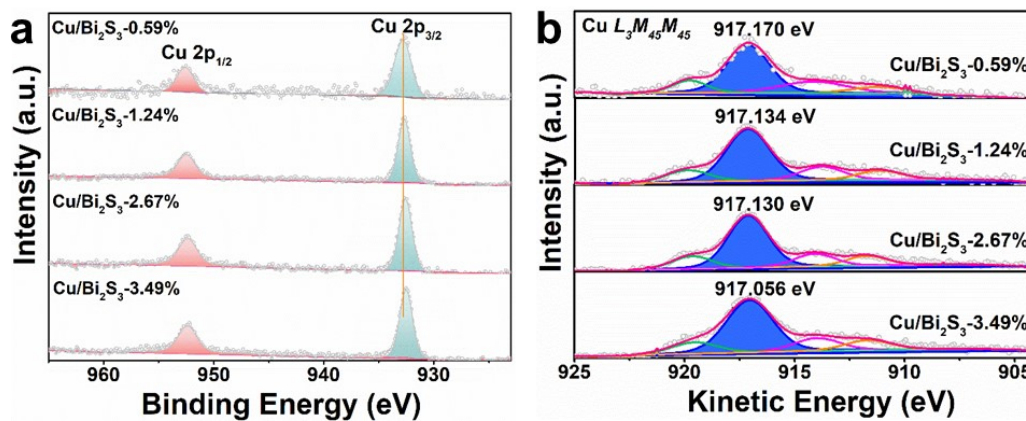

**Fig. S7** (a) Cu 2p XPS spectra and (b) Cu L<sub>3</sub>M<sub>45</sub>M<sub>45</sub> Auger spectroscopy of Cu/Bi<sub>2</sub>S<sub>3</sub>-0.59%, Cu/Bi<sub>2</sub>S<sub>3</sub>-1.24%, Cu/Bi<sub>2</sub>S<sub>3</sub>-2.67% and Cu/Bi<sub>2</sub>S<sub>3</sub>-3.49%.

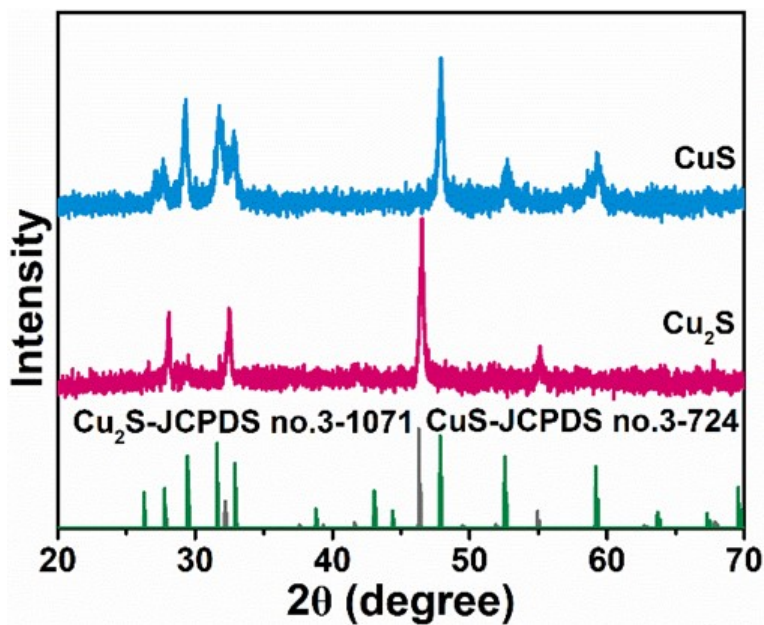

**Fig. S8** XRD patterns of Cu<sub>2</sub>S and CuS.

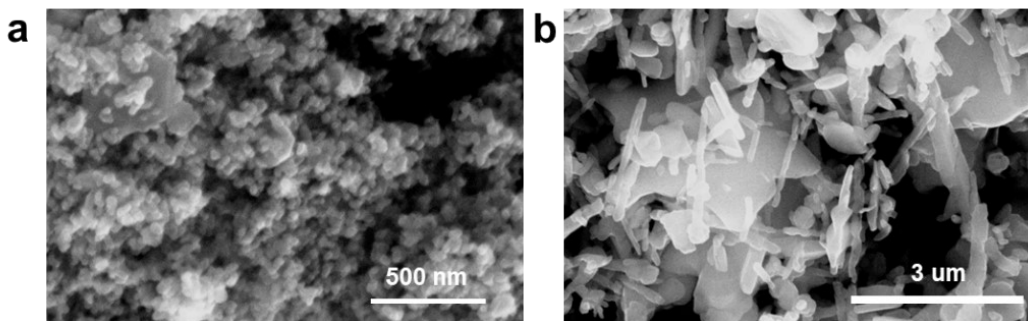

**Fig. S9** SEM images of CuS (a) and Cu<sub>2</sub>S (b).

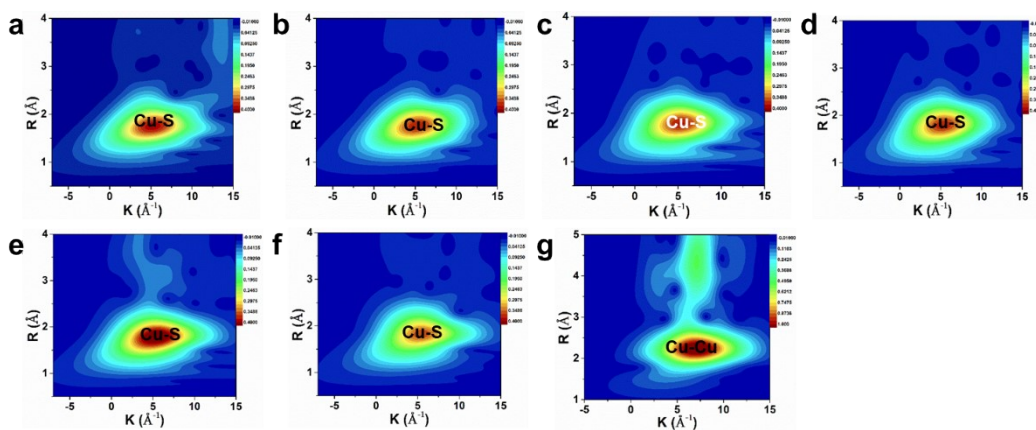

**Fig. S10** The corresponding wavelet transforms for Cu K-edge EXAFS signals of Cu/Bi<sub>2</sub>S<sub>3</sub>-0.59% (a), Cu/Bi<sub>2</sub>S<sub>3</sub>-1.24% (b), Cu/Bi<sub>2</sub>S<sub>3</sub>-2.67% (c) Cu/Bi<sub>2</sub>S<sub>3</sub>-3.49% (d), CuS (e), Cu<sub>2</sub>S (f), and Cu foil (g).

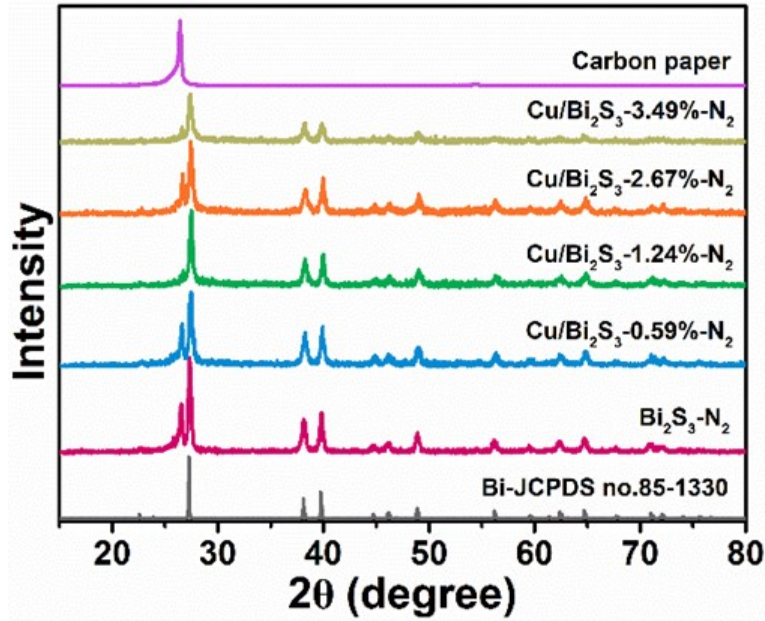

Fig. S11 XRD patterns of the different samples.

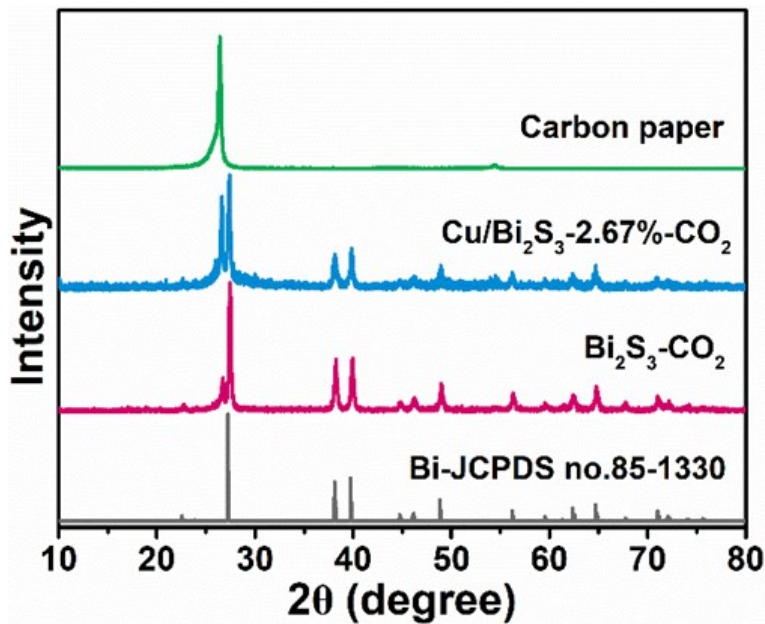

Fig. S12 XRD patterns of Bi<sub>2</sub>S<sub>3</sub>-CO<sub>2</sub>, Cu/Bi<sub>2</sub>S<sub>3</sub>-2.67%-CO<sub>2</sub> and carbon paper.

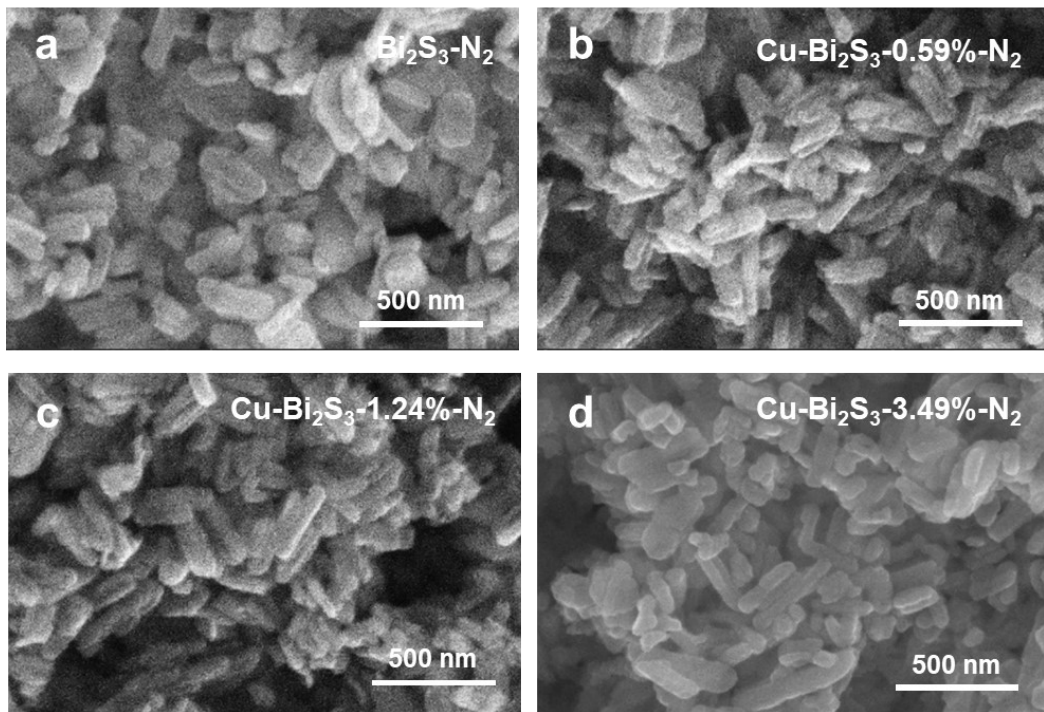

**Fig. S13** SEM images of  $\text{Bi}_2\text{S}_3\text{-N}_2$  (a),  $\text{Cu/Bi}_2\text{S}_3\text{-0.59\%-N}_2$  (b),  $\text{Cu/Bi}_2\text{S}_3\text{-1.24\%-N}_2$  (c) and  $\text{Cu/Bi}_2\text{S}_3\text{-3.49\%-N}_2$  (d).

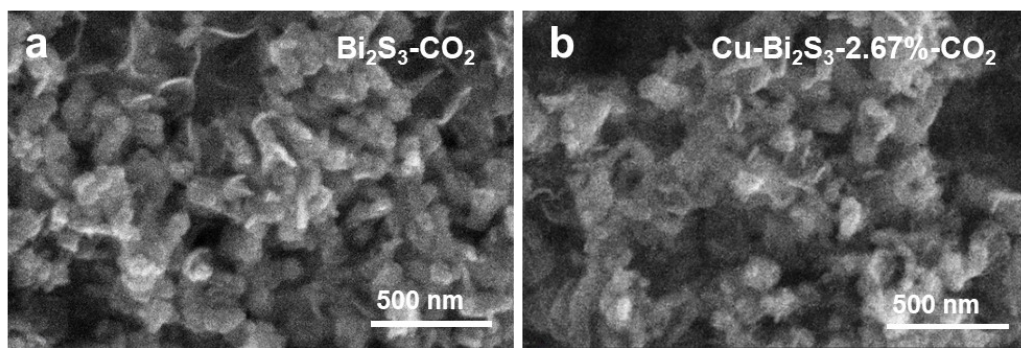

**Fig. S14** SEM images of  $\text{Bi}_2\text{S}_3\text{-CO}_2$  (a),  $\text{Cu/Bi}_2\text{S}_3\text{-2.67\%-CO}_2$  (b).



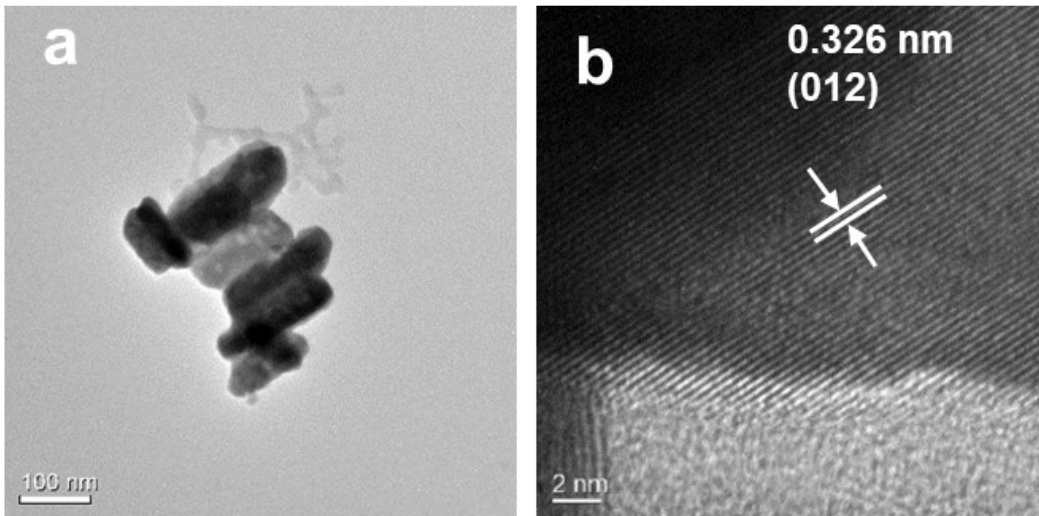

**Fig. S15** TEM (a) and HRTEM (b) images of  $\text{Bi}_2\text{S}_3\text{-N}_2$ .

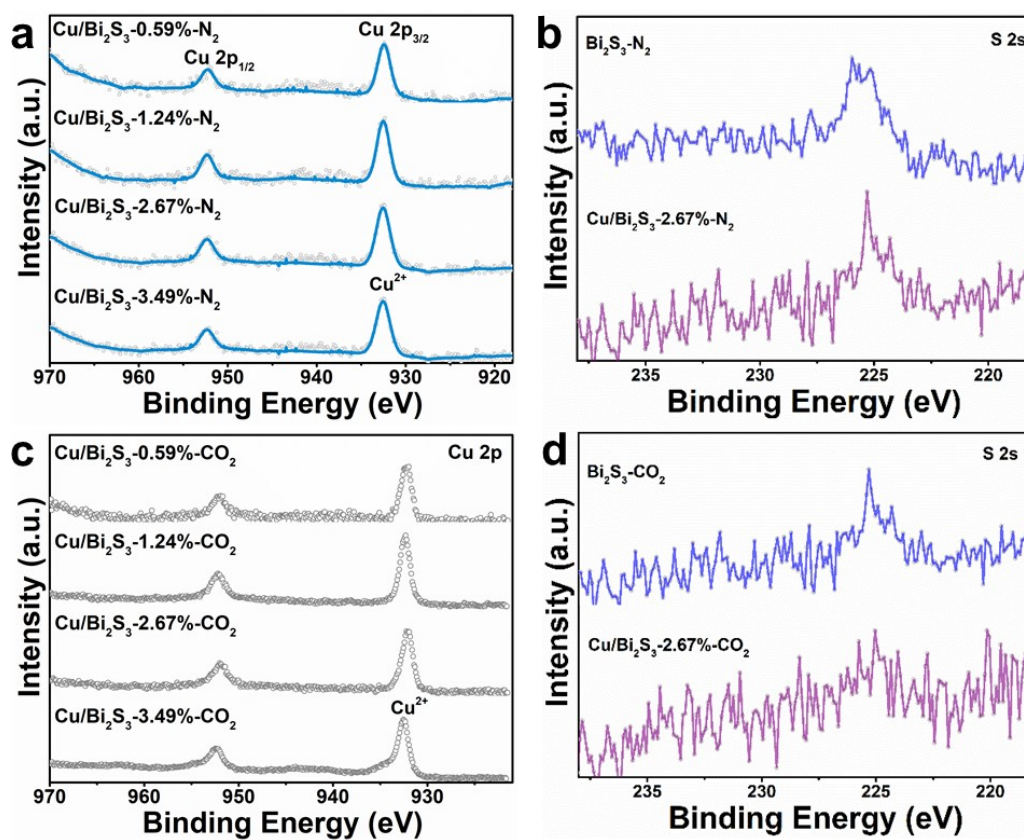

**Fig. S16** (a) Cu 2p XPS spectra and (b) S 2s XPS spectra of the different samples. (c) Cu 2p XPS spectra and (d) S 2s XPS spectra of the different samples.

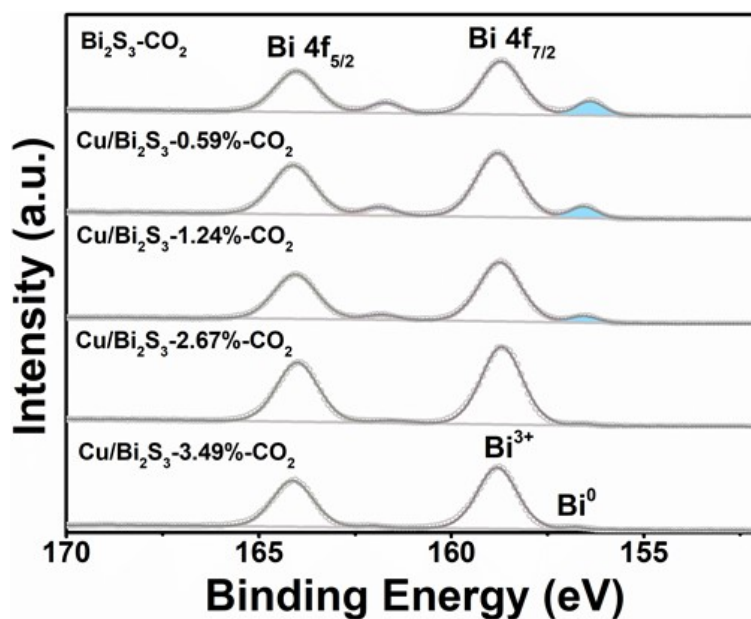

Fig. S17 Bi 4f XPS spectra Cu/Bi<sub>2</sub>S<sub>3</sub>-x-CO<sub>2</sub> catalysts (x = 0.59%, 1.24%, 2.67%, 3.49%).

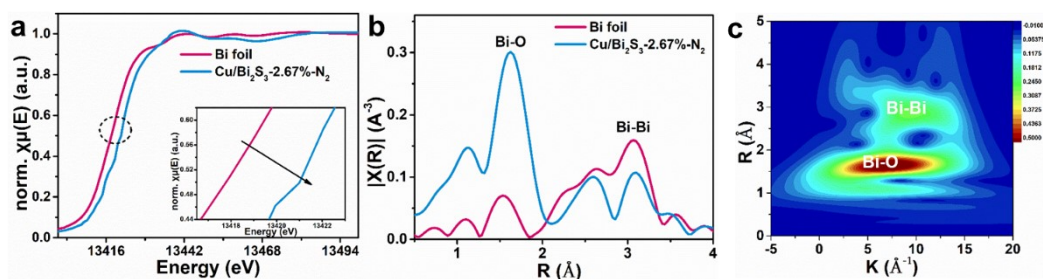

Fig. S18 (a) Bi L<sub>3</sub>-edge XANES spectra (the inset is a partial enlargement), (b) Bi L<sub>3</sub>-edge FT-EXAFS spectra in R space. (c) The corresponding wavelet transforms of Bi L<sub>3</sub>-edge EXAFS signal of Cu/Bi<sub>2</sub>S<sub>3</sub>-2.67%-N<sub>2</sub>.

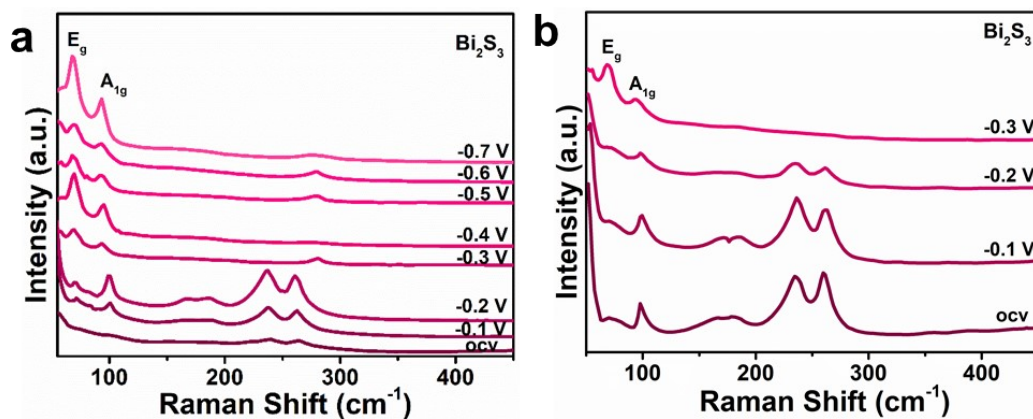

**Fig. S19** Potential-dependent in situ Raman spectra of  $\text{Bi}_2\text{S}_3$  in  $\text{N}_2$ -saturated  $\text{KHCO}_3$  solution (a) and  $\text{CO}_2$ -saturated  $\text{KHCO}_3$  solution (b).

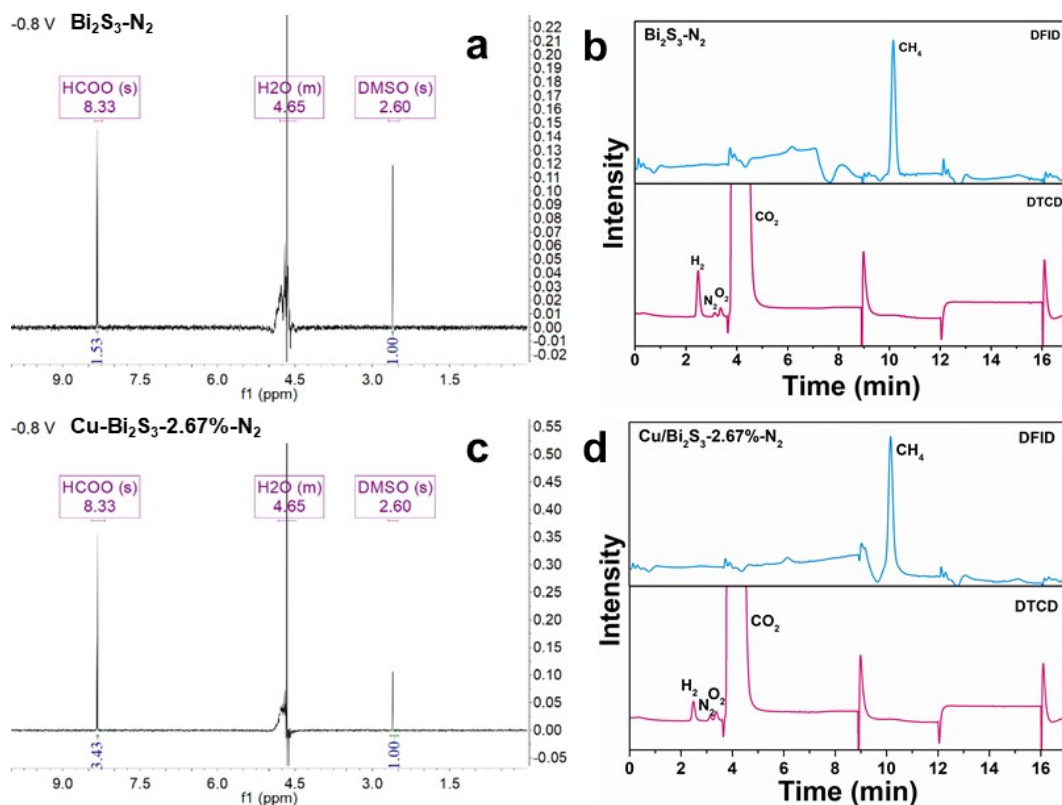

**Fig. S20** Nuclear magnetic mass spectrometry (a, c) and gas chromatography (b, d) of  $\text{Bi}_2\text{S}_3\text{-N}_2$  and  $\text{Cu/Bi}_2\text{S}_3\text{-2.67\%-N}_2$  at  $-0.8$  V vs. RHE, respectively.

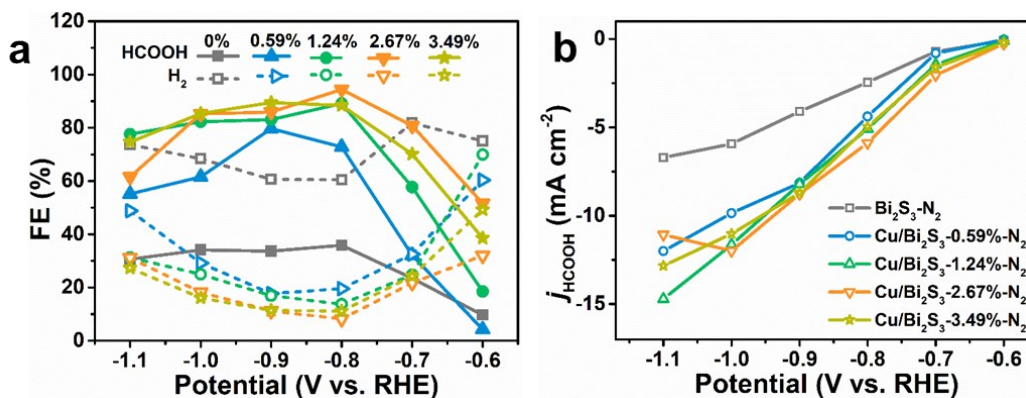

**Fig. S21** (a) Potential-dependent Faradaic efficiencies of H<sub>2</sub> and HCOOH for Bi<sub>2</sub>S<sub>3</sub>-N<sub>2</sub>, Cu/Bi<sub>2</sub>S<sub>3</sub>-0.59%-N<sub>2</sub>, Cu/Bi<sub>2</sub>S<sub>3</sub>-1.24%-N<sub>2</sub>, Cu/Bi<sub>2</sub>S<sub>3</sub>-2.67%-N<sub>2</sub> and Cu/Bi<sub>2</sub>S<sub>3</sub>-3.49%-N<sub>2</sub> in CO<sub>2</sub>-saturated 0.5 M KHCO<sub>3</sub>. (b) Potential-dependent HCOOH partial current densities of the different samples.

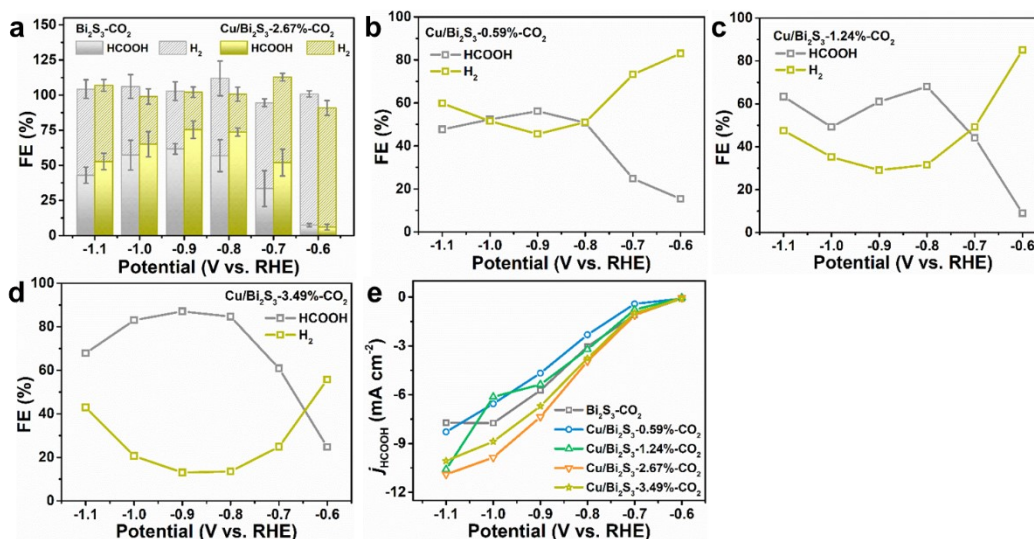

**Fig. S22** (a) Potential-dependent Faradaic efficiencies of H<sub>2</sub> and HCOOH for Bi<sub>2</sub>S<sub>3</sub>-CO<sub>2</sub> and Cu/Bi<sub>2</sub>S<sub>3</sub>-2.67%-CO<sub>2</sub> in CO<sub>2</sub>-saturated 0.5 M KHCO<sub>3</sub>. Potential-dependent Faradaic efficiencies of H<sub>2</sub> and HCOOH for Cu/Bi<sub>2</sub>S<sub>3</sub>-0.59%-CO<sub>2</sub> (b), Cu/Bi<sub>2</sub>S<sub>3</sub>-1.24%-CO<sub>2</sub> (c), and Cu/Bi<sub>2</sub>S<sub>3</sub>-3.49%-CO<sub>2</sub> (d). (e) Potential-dependent HCOOH partial current densities of the different samples.

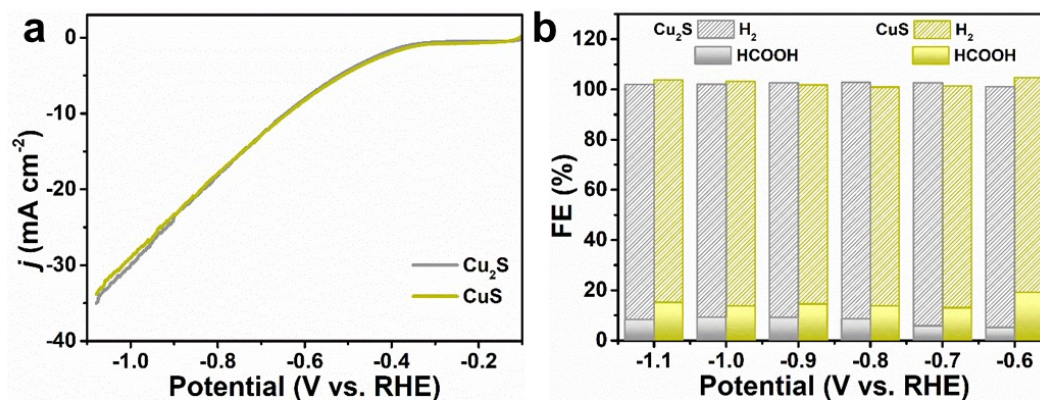

**Fig. S23** (a) LSV curves of Cu<sub>2</sub>S and CuS under CO<sub>2</sub>-saturated 0.5 M KHCO<sub>3</sub> electrolyte. (b) FEs of H<sub>2</sub> and HCOOH for Cu<sub>2</sub>S and CuS at different potentials.

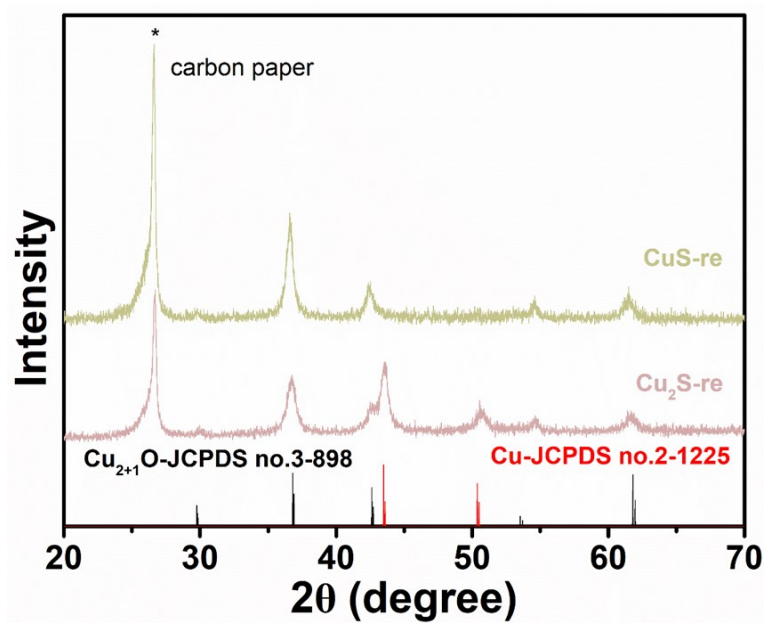

**Fig. S24** XRD patterns of Cu<sub>2</sub>S and CuS after ECO<sub>2</sub>R.

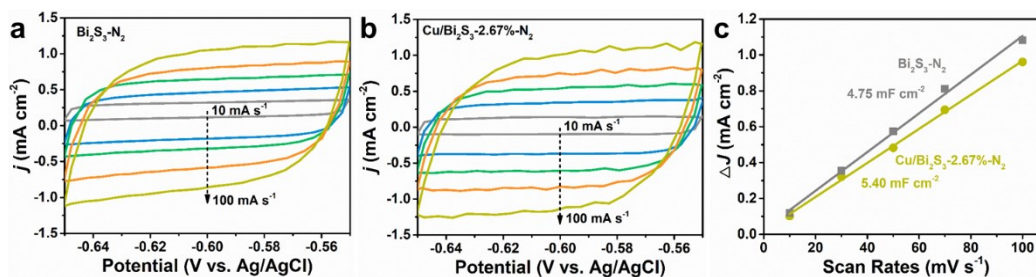

**Fig. S25** CV curves in the region of  $-0.65 \sim -0.55$  V vs. Ag/AgCl at various scan rate ( $10 \sim 100$   $\text{mV s}^{-1}$ ) of  $\text{Bi}_2\text{S}_3\text{-N}_2$  (a),  $\text{Cu/Bi}_2\text{S}_3\text{-2.67\%-N}_2$  (b). (c)  $C_{dl}$  of those materials.

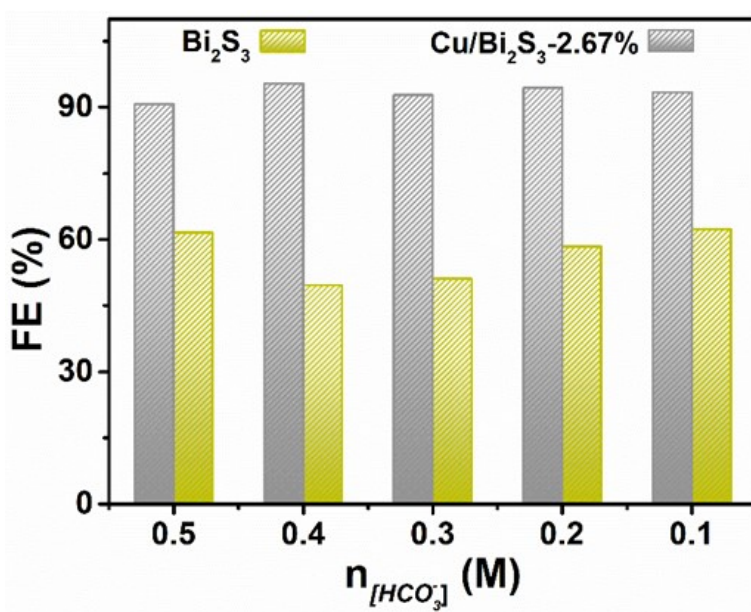

**Fig. S26** FEs of  $\text{HCOOH}$  for  $\text{Bi}_2\text{S}_3\text{-N}_2$  and  $\text{Cu/Bi}_2\text{S}_3\text{-2.67\%-N}_2$  at the different concentration of bicarbonate.

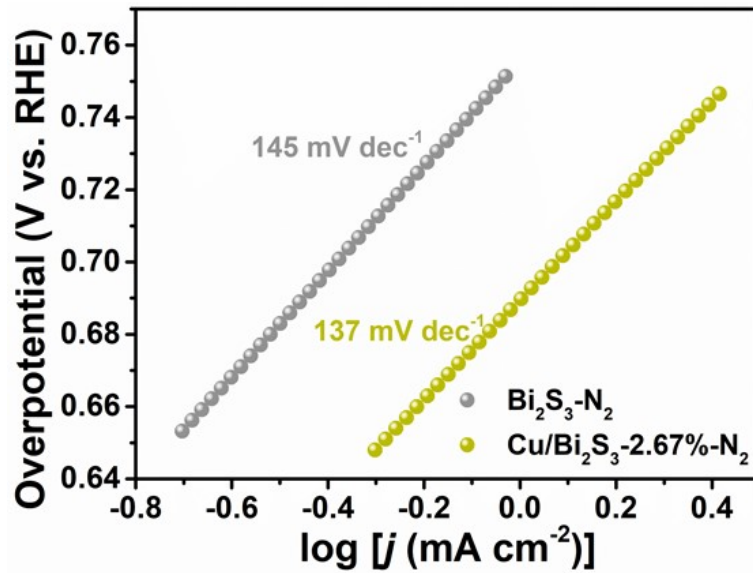

**Fig. S27** Tafel plots of different catalysts for HCOOH production.

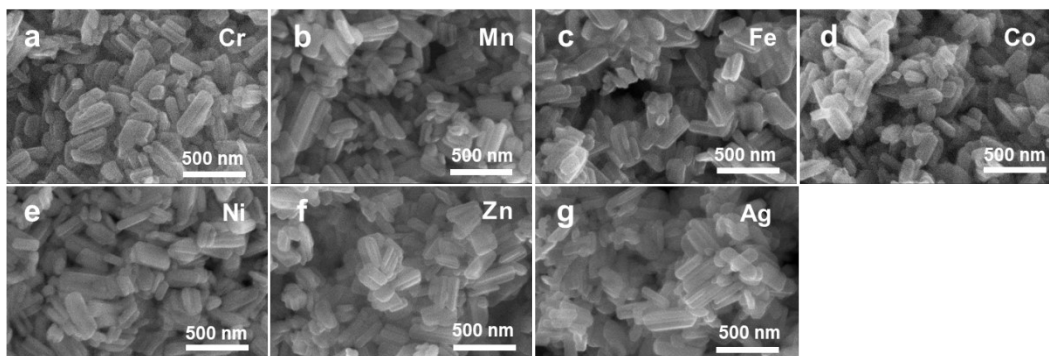

**Fig. S28** SEM images of  $\text{Bi}_2\text{S}_3$  after introducing different metal elements (Cr, Mn, Fe, Co, Ni, Zn, Ag) respectively.

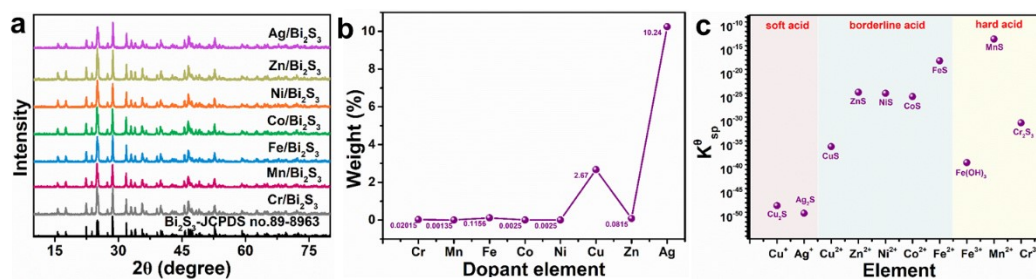

**Fig. S29** (a) XRD patterns and (b) ICP images of Bi<sub>2</sub>S<sub>3</sub> doped with different metal elements. (c) K<sub>sp</sub> images of different compounds.

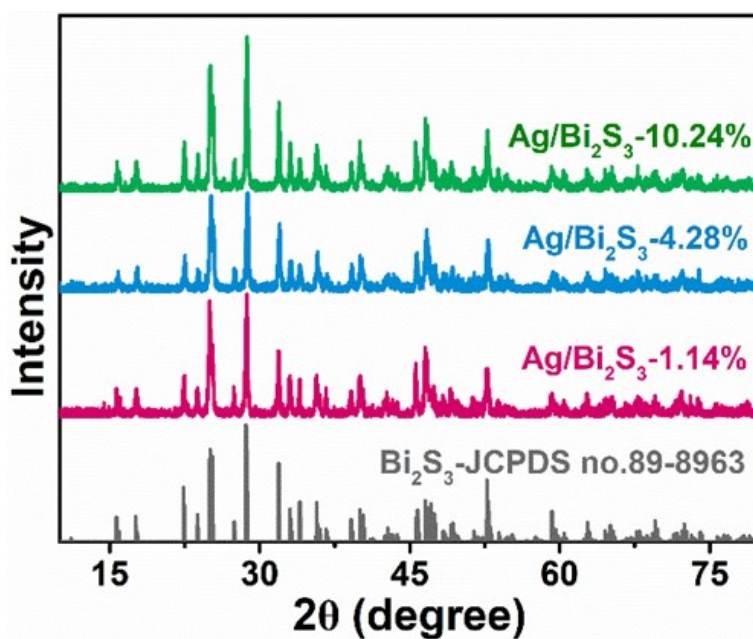

**Fig. S30** XRD patterns of Ag/Bi<sub>2</sub>S<sub>3</sub>-1.14%, Ag/Bi<sub>2</sub>S<sub>3</sub>-4.28%, and Ag/Bi<sub>2</sub>S<sub>3</sub>-10.24%.



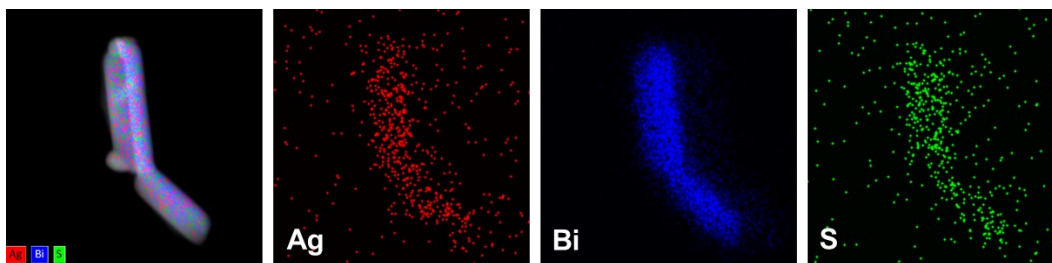

**Fig. S31** Elemental mapping images of Ag/Bi<sub>2</sub>S<sub>3</sub>-10.24%.

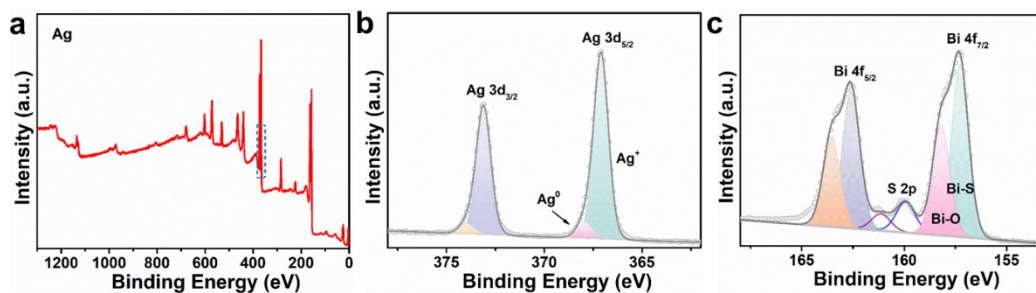

**Fig. S32** (a) XPS full spectrum, (b) Ag 3d XPS spectra and (c) Bi 4f XPS spectra of Ag/Bi<sub>2</sub>S<sub>3</sub>-10.24%.

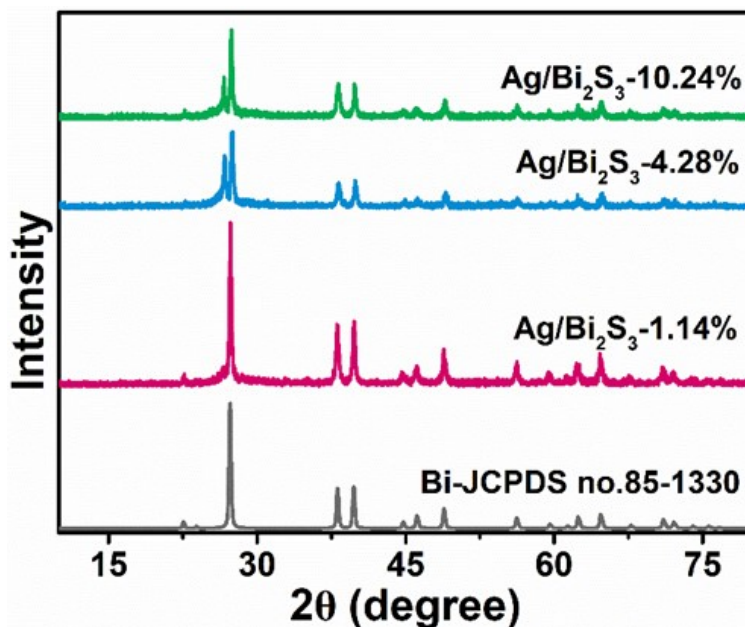

**Fig. S33** XRD patterns of Ag/Bi<sub>2</sub>S<sub>3</sub>-1.14%, Ag/Bi<sub>2</sub>S<sub>3</sub>-4.28%, and Ag/Bi<sub>2</sub>S<sub>3</sub>-10.24% after N<sub>2</sub> pretreatment.

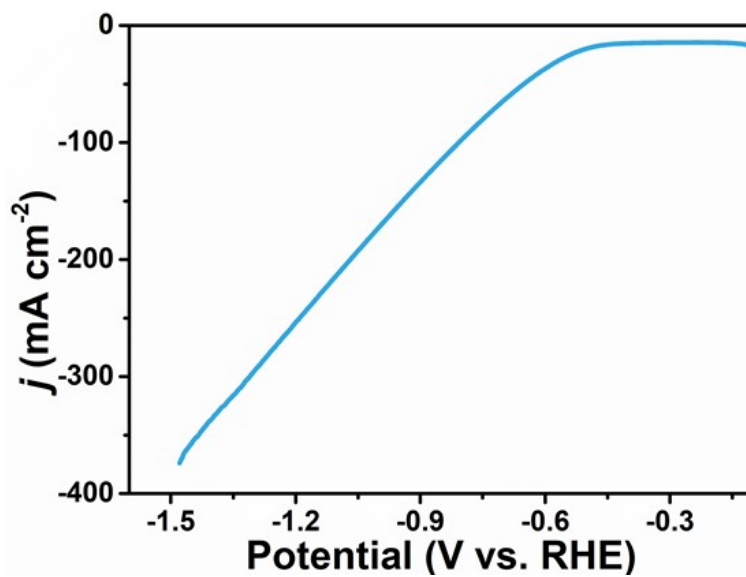

**Fig. S34** LSV curves of Cu/Bi<sub>2</sub>S<sub>3</sub>-2.67% at 1 M KOH electrolyte in flow cell.
